# Supplementary material
Source: Elsevier journal article supplement (https://www.sciencedirect.com/science/article/pii/S0300289622004896)

## **CARTA AL DIRECTOR**

### **Declinación relativa contra absoluta de la capacidad vital forzada en la Fibrosis Pulmonar Progresiva.**

**Autores:** Horacio Matías Castro<sup>1\*</sup>, Joaquin Maritano Furcada<sup>1</sup>, y Juan Ignacio Enghelmayer<sup>2</sup>

1-Sección de Neumonología, Hospital Italiano de Buenos Aires, Argentina.

2-División Neumonología, Hospital de Clínicas José de San Martín

\*-Autor para correspondencia.

No poseemos conflictos de intereses relacionados directa o indirectamente con los contenidos del manuscrito y no contamos con fuentes de financiación para el desarrollo del mismo.

#### **Datos de contacto Autor de Correspondencia:**

- Dirección postal: C1199
- Correo electrónico: [matias.castro@hospitalitaliano.org.ar](mailto:matias.castro@hospitalitaliano.org.ar)

## Al Director:

Las enfermedades pulmonares intersticiales difusas (EPID) presentan diferentes causas, tratamientos y progresión. Un subgrupo de EPID progresan en el tiempo pese a recibir el tratamiento adecuado y se las denomina Fibrosis Pulmonar Progresiva (FPP)<sup>1</sup>. El porcentaje de pacientes que presentan FPP para cada EPID fibrótica es variable (entre un 3-63%) según la entidad<sup>2</sup>. No existía un acuerdo internacional en la definición de la FPP hasta la publicación de un consenso intersociedades<sup>1</sup>. En dicho documento se definió la presencia de FPP cuando el paciente presenta dentro del último año como mínimo 2 de los siguientes cambios sin una explicación alternativa: 1) Empeoramiento de los síntomas respiratorios (tos y/o disnea). 2) Disminución  $\geq 5\%$  en la capacidad vital forzada (CVF, % absoluto) y/o disminución de  $\geq 10\%$  en la difusión pulmonar de monóxido de carbono (% absoluto). 3) Incremento o aparición de imágenes radiológicas fibrosantes. Previamente, la definición de progresión más utilizada fue la del estudio INBUILD que considero como parte de sus criterios de inclusión la declinación relativa de la CVF. Estos criterios son motivo de discusión, queremos resaltar la definición, diferencias e implicancias de la declinación absoluta o relativa de la CVF para definir progresión.

La declinación de la CVF es un criterio de progresión y predictor de mortalidad en EPID fibróticas<sup>2</sup>. La declinación (en términos porcentuales) absoluta es el resultado de la CVF inicial - la CVF final y la declinación relativa es el resultado de la (CVF inicial - la CVF final) /la CVF inicial<sup>3</sup>. Ambas mediciones son similares cuando el paciente presenta una CVF conservada pero difieren de manera creciente cuanto más bajo es el nivel de CVF (Figura 1). En valores más severos de la CVF basal existe un mayor riesgo de identificar fluctuaciones aleatorias o sin relevancia clínica usando el método relativo<sup>3</sup>. La elección del método impacta en el diseño y los resultados de los ensayos clínicos. Utilizando el método relativo para calcular una declinación  $\geq 5\%$  de la CVF, se reducen los requerimientos del tamaño muestral<sup>3</sup>. Un estudio retrospectivo demostró que al utilizar diferentes definiciones de progresión se modifica el porcentaje de pacientes que presentan una FPP<sup>4</sup>. Además, la elección del método también impacta en la detección más precoz de los pacientes progresores (el método relativo gana en sensibilidad aún con el riesgo de perder algo de especificidad) con el consiguiente efecto que esto tiene en la indicación de tratamiento antifibrótico y en el pronóstico del paciente. Por último, hay que tener en cuenta que la diferencia mínima clínicamente importante, en pacientes con FPI, para el porcentaje de disminución absoluta de la CVF se estima entre 2-6%<sup>5</sup>. Este valor en pacientes con FPP es desconocido. Serían de valor, estudios que evalúen la diferencia mínima clínicamente importante de la declinación relativa y absoluta de la CVF en pacientes con FPP.

En conclusión, cambios en los criterios de la definición de FPP pueden conllevar implicancias pronósticas y terapéuticas. El método relativo permite una detección precoz de la declinación pero es más vulnerable a fluctuaciones aleatorias sin relevancia clínica.

## Referencias:

1. Raghu G, Remy-Jardin M, Richeldi L, Thomson CC, Inoue Y, Johkoh T, et al. Idiopathic Pulmonary Fibrosis (an Update) and Progressive Pulmonary Fibrosis in Adults: An Official ATS/ERS/JRS/ALAT Clinical Practice Guideline. *Am J Respir Crit Care Med* 2022;205:e18–47.
2. Molina-Molina M, Buendia-Roldan I, Castillo D, Caro F, Valenzuela C, Selman M. Novedades diagnósticas y terapéuticas en fibrosis pulmonar progresiva. *Archivos de Bronconeumología* 2022;58:418–24.
3. Richeldi L, Ryerson CJ, Lee JS, Wolters PJ, Koth LL, Ley B, et al. Relative versus absolute change in forced vital capacity in idiopathic pulmonary fibrosis. *Thorax* 2012;67:407–11.
4. Torrisi SE, Kahn N, Wälscher J, Polke M, Lee JS, Molyneaux PL, et al. Outcomes and Incidence of PF-ILD According to Different Definitions in a Real-World Setting. *Front Pharmacol.* 2021 Dec 17;12:790204.
5. Du Bois RM, Weycker D, Albera C, Bradford WZ, Costabel U, Kartashov A, et al. Forced vital capacity in patients with idiopathic pulmonary fibrosis: test properties and minimal clinically important difference. *Am J Respir Crit Care Med* 2011;184:1382–9.

**Figura 1.** Comparación de la declinación porcentual del 5% de la CVF en valores absolutos y relativos según el valor basal de CVF de un paciente teórico. **A)** Paciente con CVF basal conservada y **B)** Paciente con CVF basal disminuida. A medida que los valores basales de la CVF disminuyen, se incrementa la diferencia entre el valor porcentual del método relativo y el absoluto. El método relativo es más sensible para detectar la declinación y esto es más marcado en pacientes con reducción basal de su CVF.

*Declinación Absoluta CVF*= CVF inicial – CVF final; *Declinación Relativa*: (CVF inicial – CVF final) / CVF inicial; CVF: Capacidad vital forzada; L: Litros;  $\Delta$ : Delta de cambio entre una declinación relativa y absoluta del 5% de la CVF.

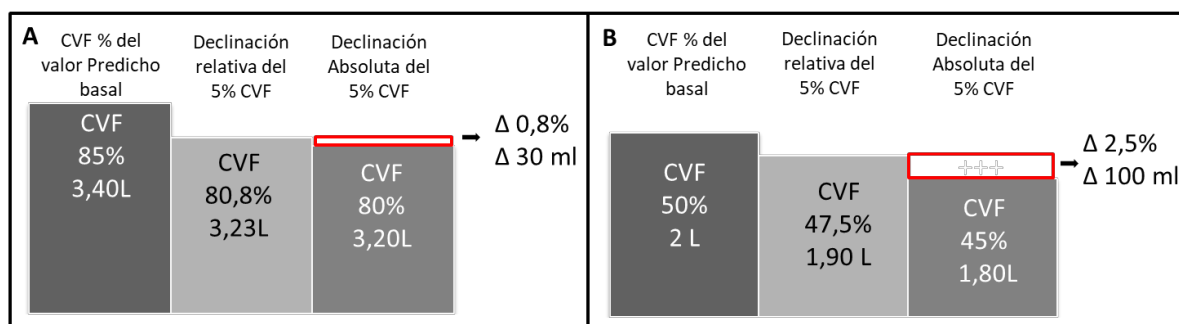

Supplement: mmc1 [file S0300289622004896:mmc1.pdf]
